# Supplementary material for: Highly luminescent and stable lyotropic liquid crystals based on a europium β-diketonate complex bridged by an ethylammonium cation
Source: Royal Society of Chemistry journal article supplement (doi:10.1039/c6cp05940f), 2016-01-01
Supplement: c6cp05940f1.pdf [file c6cp05940f1.pdf]

*Electronic Supplementary Information (ESI)*

**Highly luminescent and stable lyotropic liquid crystals based on europium  $\beta$ -diketonate complex bridged by ethylammonium cation**

Sijing Yi,<sup>a</sup> Meihuan Yao,<sup>b</sup> Jiao Wang,<sup>a</sup> Xiao Chen<sup>\*a</sup>

<sup>a</sup> Key Laboratory of Colloid and Interface Chemistry, Shandong University, Ministry of Education,

Jinan, 250100, China

<sup>b</sup> School of Chemistry and Chemical Engineering, Henan Normal University, Xinxiang, 453007,

China

**\*Corresponding author: Xiao Chen**

**Address:** Key Laboratory of Colloid and Interface Chemistry, Shandong University, Ministry of Education, Jinan, 250100, China

**E-mail:** [xchen@sdu.edu.cn](mailto:xchen@sdu.edu.cn).

**Tel.:** +86-531-88365420.

**Fax:** +86-531-88564464.

## 1. X-ray Crystallography

The cell parameters were retrieved and refined using the softwares of SMART and SAINT on all observed reflections.<sup>1</sup> The data reduction was performed with SAINT and corrected for Lorentz and polarization effects. The absorption corrections were applied with the program SADABS.<sup>1</sup> In all cases, the highest possible space group was chosen. All structures were solved by direct methods and refined on  $F^2$  by full-matrix least-squares procedures with SHELXL-97.<sup>2</sup> The hydrogen atoms were placed in calculated positions and included as riding atoms with isotropic displacement parameters 1.2-1.5 times  $U_{eq}$  of the attached carbon atoms. Pertinent crystallographic data and refinement parameters for EA-Eu and Bmim-Eu complexes were respectively collected in Table S1, with the ball-and-stick representation of the molecular structure for Bmim-Eu complex shown in Figure S1.

**Table S1 Crystal and Structure Refinement Data for EA-Eu and Bmim-Eu complexes.**

| Parameter                | EA-Eu                         | Bmim-Eu                         |
|--------------------------|-------------------------------|---------------------------------|
| Empirical formula        | $C_{34}H_{24}EuF_{12}NO_8S_4$ | $C_{40}H_{31}EuF_{12}N_2O_8S_4$ |
| Formula weight           | 1082.74                       | 1175.87                         |
| Temperature/K            | 298.15                        | 298.15                          |
| Crystal system           | triclinic                     | monoclinic                      |
| Space group              | P-1                           | $P2_1/c$                        |
| a/Å                      | 10.0179(8)                    | 10.652(3)                       |
| b/Å                      | 12.2989(11)                   | 20.230(6)                       |
| c/Å                      | 17.6698(16)                   | 23.314(5)                       |
| $\alpha/^\circ$          | 100.592(5)                    | 90                              |
| $\beta/^\circ$           | 95.431(5)                     | 106.314(10)                     |
| $\gamma/^\circ$          | 102.457(5)                    | 90                              |
| Volume/Å <sup>3</sup>    | 2069.05(32)                   | 4822(2)                         |
| Z                        | 2                             | 4                               |
| $\rho_{calc}/g\ cm^{-3}$ | 1.738                         | 1.620                           |

|                                                |                                                               |                                                               |
|------------------------------------------------|---------------------------------------------------------------|---------------------------------------------------------------|
| $\mu/\text{mm}^{-1}$                           | 1.820                                                         | 1.570                                                         |
| F(000)                                         | 1068.0                                                        | 2336.0                                                        |
| Crystal size/ $\text{mm}^3$                    | $0.07 \times 0.06 \times 0.06$                                | $0.1 \times 0.08 \times 0.02$                                 |
| 2 $\theta$ range for data collection/ $^\circ$ | 5.102 to 49.992                                               | 4.998 to 50                                                   |
| Index ranges                                   | $-11 \leq h \leq 11, -14 \leq k \leq 14, -21 \leq l \leq 21$  | $-12 \leq h \leq 12, -24 \leq k \leq 23, -27 \leq l \leq 25$  |
| Reflections collected                          | 20685                                                         | 19863                                                         |
| Independent reflections                        | 7261 [ $R_{\text{int}} = 0.0293, R_{\text{sigma}} = 0.0334$ ] | 8483 [ $R_{\text{int}} = 0.0840, R_{\text{sigma}} = 0.1344$ ] |
| Data/restraints/parameters                     | 7261/78/570                                                   | 8483/127/633                                                  |
| Goodness-of-fit on $F^2$                       | 1.095                                                         | 0.983                                                         |
| Final R indexes [ $I \geq 2\sigma(I)$ ]        | $R_1 = 0.0423, wR_2 = 0.1135$                                 | $R_1 = 0.0867, wR_2 = 0.2170$                                 |
| Final R indexes [all data]                     | $R_1 = 0.0491, wR_2 = 0.1200$                                 | $R_1 = 0.1681, wR_2 = 0.2644$                                 |
| Largest diff. peak/hole / $e \text{ \AA}^{-3}$ | 2.07/-1.38                                                    | 2.51/-1.31                                                    |

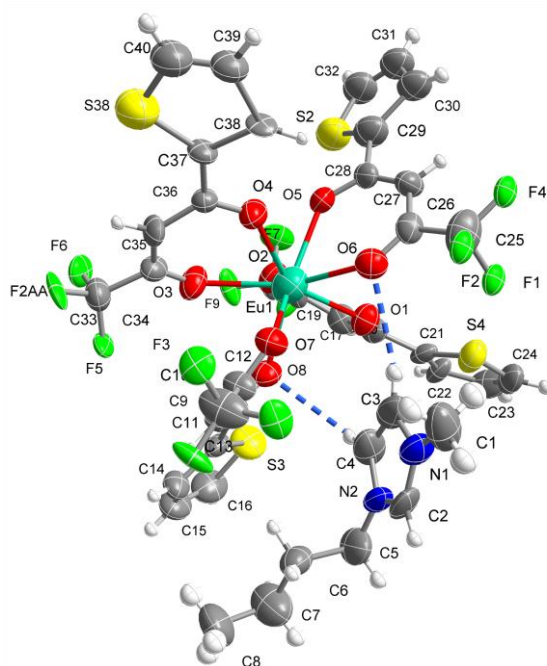

**Fig. S1** Ortep view of the coordination structure for Bmim-Eu complex.

## 2. Luminescence Decay Curves for Pure EA-Eu Complex and Its Liquid Phase

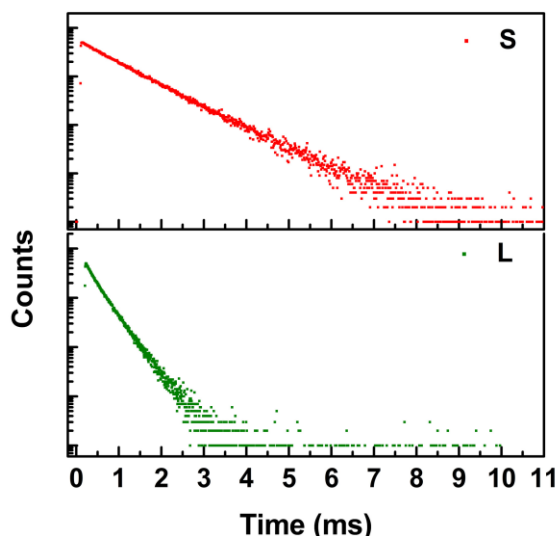

**Fig. S2** Luminescence decay curves of pure EA-Eu complex (S) and its liquid phase by dissolving in EAN (L) observed at 612 nm at room temperature. The excitation wavelengths were 395 and 327 nm, respectively. All curves could be well-fitted by a mono-exponential function.

## 3. Calculation of the quantum efficiency ( $Q$ ), radiative ( $k_r$ ) and nonradiative ( $k_{nr}$ ) rate constants

On the basis of the data from emission spectra and  $^5D_0$  lifetimes, the  $^5D_0$  quantum efficiency ( $Q$ ), radiative ( $k_r$ ) and nonradiative ( $k_{nr}$ ) rate constants could be estimated.<sup>3</sup> The radiative contribution ( $k_r$ ) could be obtained from the relative intensities of the  $^5D_0 \rightarrow ^7F_{0-6}$  transitions of  $Eu^{3+}$ . The  $^5D_0 \rightarrow ^7F_5$  and  $^5D_0 \rightarrow ^7F_6$  transitions could be ignored in the depopulation of the  $^5D_0$  excited state since these transitions presented very weak intensities in our emission spectra, which contributed less than 5% to the total luminescence output. The  $^5D_0 \rightarrow ^7F_1$  transition could be taken as a reference for its dipolar magnetic nature, so  $k_r$  could be given as

$$k_r = \sum_{J=0}^4 k_{0 \rightarrow J} = k_{01} \sum_{J=0}^4 \left( \frac{S_{0J}}{S_{01}} \right) \left( \frac{\nu_{01}}{\nu_{0J}} \right) \quad (1)$$

where  $S_{01}$  and  $S_{0J}$  were the integrated intensity (areas under the curves) of the  $^5D_0 \rightarrow ^7F_1$  and  $^5D_0 \rightarrow ^7F_J$  transitions, with  $\nu_{01}$  and  $\nu_{0J}$  being their energy barycentres, respectively.  $k_{01}$  was the Einstein coefficient of spontaneous emission between the  $^5D_0$  and  $^7F_1$  energy levels and could be determined to be about  $50 \text{ s}^{-1}$  in air.<sup>4</sup> From the experimental  $^5D_0$  decay rate, the non-radiative contribution could

be calculated by assuming that

$$\frac{1}{\tau_{obs}} = k_r + k_{nr} \quad (2)$$

where  $\tau_{obs}$  was the observed luminescence lifetime of the  $^5D_0$  excited state. Assuming that only nonradiative and radiative processes were involved in the depopulation of the  $^5D_0$  state, the quantum efficiency ( $Q$ ) could be determined using the formula: <sup>4</sup>

$$Q = \frac{k_r}{k_r + k_{nr}} \quad (3)$$

#### 4. SAXS Profiles

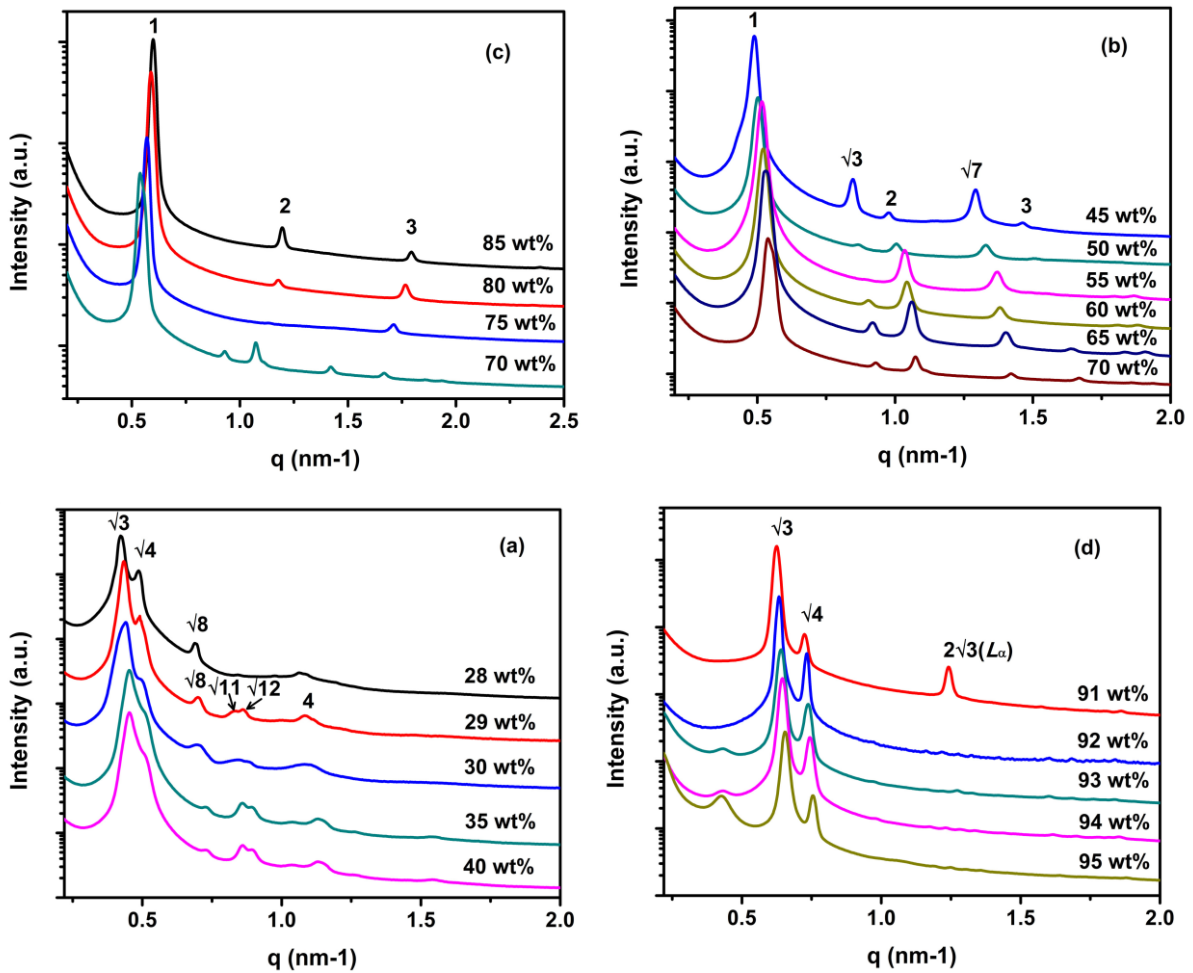

**Fig. S3** SAXS profiles for LLC matrices at different P123 concentrations: a.  $I_1$ , b.  $H_1$ , c.  $L_\alpha$ , d.  $V_2$ .

## 5. Excitation Spectra

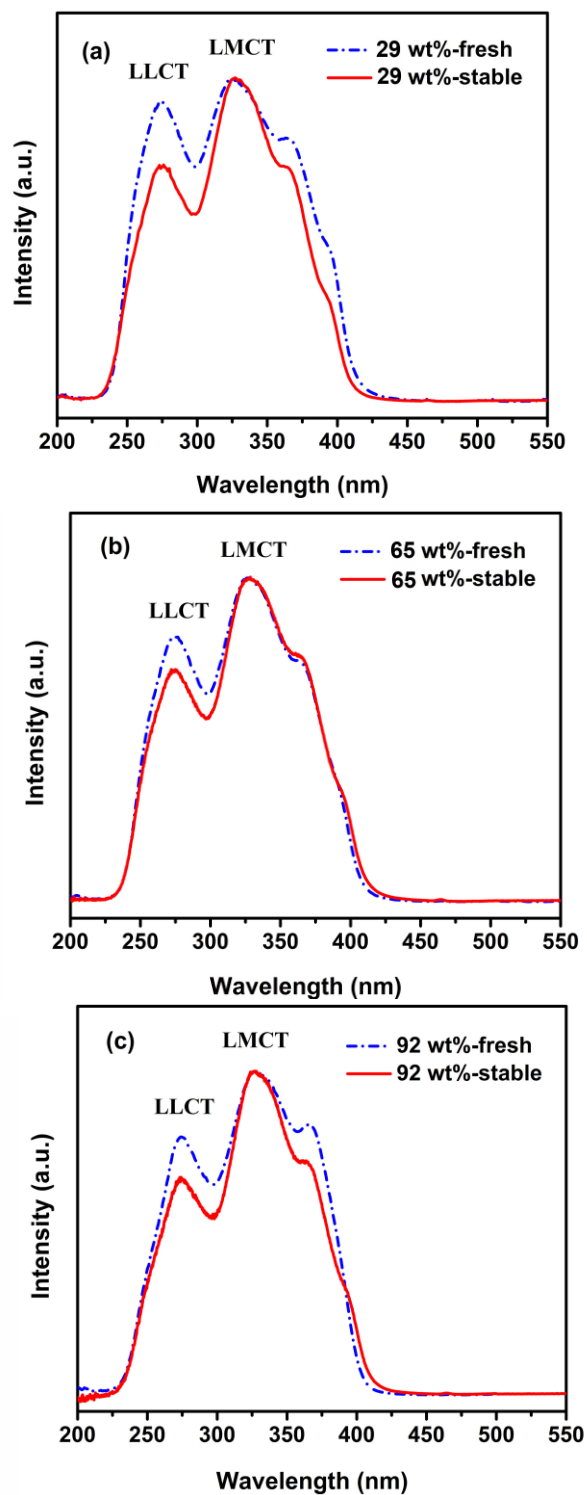

**Fig. S4** The excitation spectra of EA-Eu-doped LLC materials in different mesophases:

a.  $I_1$ , b.  $H_1$ , c.  $V_2$ .

## 6. Luminescence Decay Curves for LLC Materials in Different Mesophases

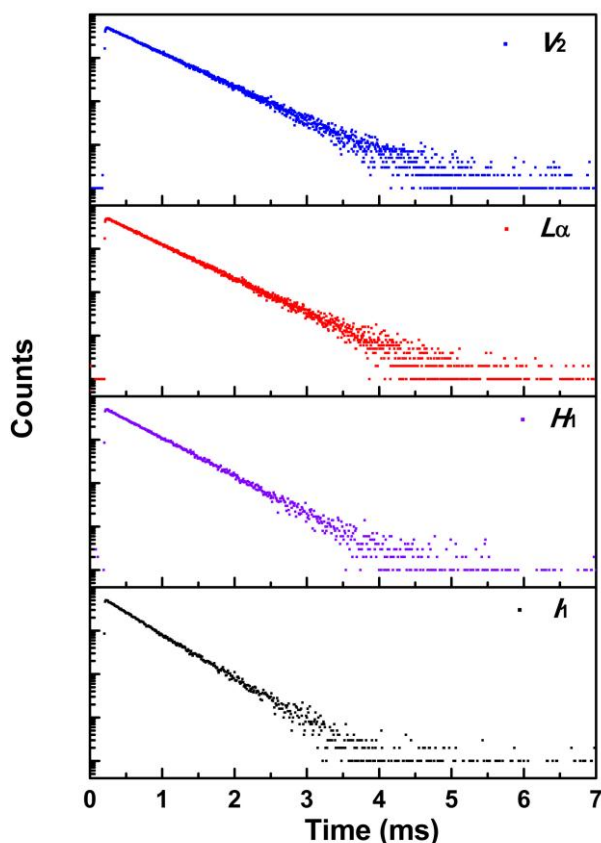

**Fig. S5** Luminescence decay curves of luminescent LLC materials at different mesophases under excitation at 326 nm and observed at 612 nm at room temperature. All curves could be well-fitted by a mono-exponential function.

## 7. Calculation of the lattice parameters for liquid crystalline phases

The lattice parameter of LLC phases,  $a$ , corresponds respectively to the lamellae periodicity for the lamellar structure, and the distance between the centers of two adjacent cylinders for the hexagonal structure. It can be calculated from the first Bragg scattering position ( $q_1$ ) in SAXS profiles according to the following equations:<sup>5</sup>

$$\text{Lamellar phase: } a = 2\pi/q_1, \quad \text{Hexagonal phase: } a = 4\pi/\sqrt{3}q_1 \quad (4)$$

For the micelle and reverse bicontinuous cubic structure, the cell lattice parameter can be obtained by the slope of a curve, which is got by plotting the reciprocal spacings ( $1/d_{hkl}$ ) of the various reflections versus  $m = (h^2+k^2+l^2)^{1/2}$ , where  $h, k, l$  are the Miller indices.<sup>6</sup>

## 8. FTIR Spectrum of EAN and Pure EA-Eu Complex.

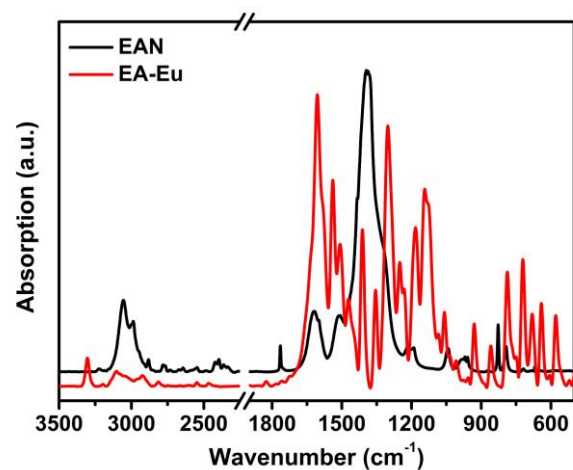

Fig. S6 FT-IR spectra of pure EAN and EA-Eu complex.

## References

1. Bruker. SMART, SAINT and SADABS. Bruker AXS Inc., Madison, Wisconsin, USA, 1998.
2. G. M. Sheldrick, SHELXS-97, Program for X-ray Crystal Structure Solution, University of Göttingen, Göttingen, Germany, 1997.
3. V. de Zea Bermudez, R. A. Sá Ferreira, L. D. Carlos, A. Charas, J. Morgado, M. J. Smith and M. Fernandes, *Chem.Mater.*, 2007, **19**, 3892-3901.
4. Y. F. Shao, B. Yan and Q. P. Li, *Eur. J. Inorg. Chem.*, 2013, **3**, 381-387.
5. R. Ivanova, P. Alexandridis and B. Lindman, *Colloids Surf. A*, 2001, **183**, 41-53.
6. R. Ivanova, B. Lindman and P. Alexandridis, *Langmuir*, 2000, **16**, 9058-9069.
